# Supplementary material for: Multiple parallel origins of parasitic Marine Alveolates
Source: Research Square preprint supplement (doi:10.21203/rs.3.rs-1472581/v2), 2023-05-01
Supplement: Supplementary file 1 [file 2173b0a8ff9e09de3f29ca43.xlsx]

## Sheet: results >97%ID
Count	Query	Hits	BioProject accession	Sample type	location	percent identity	percent query coverage	e-value	bit score
1	V9 18S rRNA Colp-25	SRR5240843.16167;sample=SRR5240843	PRJNA369575	Water column	Arafura Sea, Torres Strait, Coral Sea - Australia	99.16	100	8.08e-52	210
2	V9 18S rRNA Colp-25	SRR5240843.16166;sample=SRR5240843	PRJNA369575	Water column	Arafura Sea, Torres Strait, Coral Sea - Australia	99.16	100	8.08e-52	210
3	V9 18S rRNA Colp-25	SRR6930477.101743;sample=SRR6930477	PRJNA408198	Marine sediment	Chowder Bay, Sydney - Australia (33°50′22″S, 151°15′17″E)	100	100	1.9e-53	215
4	V9 18S rRNA Colp-25	SRR6930474.29827;sample=SRR6930474	PRJNA408198	Marine sediment	Chowder Bay, Sydney - Australia (33°50′22″S, 151°15′17″E)	100	100	1.9e-53	215
5	V9 18S rRNA Colp-25	SRR6930474.27646;sample=SRR6930474	PRJNA408198	Marine sediment	Chowder Bay, Sydney - Australia (33°50′22″S, 151°15′17″E)	100	100	1.9e-53	215
6	V9 18S rRNA Colp-25	SRR6930474.7199;sample=SRR6930474	PRJNA408198	Marine sediment	Chowder Bay, Sydney - Australia (33°50′22″S, 151°15′17″E)	100	100	1.9e-53	215
7	V9 18S rRNA Colp-25	SRR6930456.8234;sample=SRR6930456	PRJNA408198	Marine sediment	Chowder Bay, Sydney - Australia (33°50′22″S, 151°15′17″E)	100	100	1.9e-53	215
8	V9 18S rRNA Colp-25	SRR6930433.88919;sample=SRR6930433	PRJNA408198	Marine sediment	Chowder Bay, Sydney - Australia (33°50′22″S, 151°15′17″E)	100	100	1.9e-53	215
9	V9 18S rRNA Colp-25	SRR6930429.70739;sample=SRR6930429	PRJNA408198	Marine sediment	Chowder Bay, Sydney - Australia (33°50′22″S, 151°15′17″E)	100	100	1.9e-53	215
10	V9 18S rRNA Colp-25	SRR6930399.70297;sample=SRR6930399	PRJNA408198	Marine sediment	Chowder Bay, Sydney - Australia (33°50′22″S, 151°15′17″E)	100	100	1.9e-53	215
11	V9 18S rRNA Colp-25	SRR6930392.10441;sample=SRR6930392	PRJNA408198	Marine sediment	Chowder Bay, Sydney - Australia (33°50′22″S, 151°15′17″E)	100	100	1.9e-53	215
12	V9 18S rRNA Colp-25	SRR6930372.61109;sample=SRR6930372	PRJNA408198	Marine sediment	Chowder Bay, Sydney - Australia (33°50′22″S, 151°15′17″E)	100	100	1.9e-53	215
13	V9 18S rRNA Colp-25	SRR6930371.133419;sample=SRR6930371	PRJNA408198	Marine sediment	Chowder Bay, Sydney - Australia (33°50′22″S, 151°15′17″E)	100	100	1.9e-53	215
14	V9 18S rRNA Colp-25	SRR6930371.94736;sample=SRR6930371	PRJNA408198	Marine sediment	Chowder Bay, Sydney - Australia (33°50′22″S, 151°15′17″E)	100	100	1.9e-53	215
15	V9 18S rRNA Colp-25	SRR6930371.51171;sample=SRR6930371	PRJNA408198	Marine sediment	Chowder Bay, Sydney - Australia (33°50′22″S, 151°15′17″E)	100	100	1.9e-53	215
16	V9 18S rRNA Colp-25	SRR6930371.6985;sample=SRR6930371	PRJNA408198	Marine sediment	Chowder Bay, Sydney - Australia (33°50′22″S, 151°15′17″E)	100	100	1.9e-53	215
17	V9 18S rRNA Colp-25	SRR6930370.66164;sample=SRR6930370	PRJNA408198	Marine sediment	Chowder Bay, Sydney - Australia (33°50′22″S, 151°15′17″E)	100	100	1.9e-53	215
18	V9 18S rRNA Colp-25	SRR6930352.102982;sample=SRR6930352	PRJNA408198	Marine sediment	Chowder Bay, Sydney - Australia (33°50′22″S, 151°15′17″E)	100	100	1.9e-53	215
19	V9 18S rRNA Colp-25	SRR6930352.18034;sample=SRR6930352	PRJNA408198	Marine sediment	Chowder Bay, Sydney - Australia (33°50′22″S, 151°15′17″E)	100	100	1.9e-53	215
20	V9 18S rRNA Colp-25	SRR6930352.2470;sample=SRR6930352	PRJNA408198	Marine sediment	Chowder Bay, Sydney - Australia (33°50′22″S, 151°15′17″E)	100	100	1.9e-53	215
21	V9 18S rRNA Colp-25	SRR6930347.142877;sample=SRR6930347	PRJNA408198	Marine sediment	Chowder Bay, Sydney - Australia (33°50′22″S, 151°15′17″E)	100	100	1.9e-53	215
22	V9 18S rRNA Colp-25	SRR6930342.78209;sample=SRR6930342	PRJNA408198	Marine sediment	Chowder Bay, Sydney - Australia (33°50′22″S, 151°15′17″E)	100	100	1.9e-53	215
23	V9 18S rRNA Colp-25	SRR6930342.23009;sample=SRR6930342	PRJNA408198	Marine sediment	Chowder Bay, Sydney - Australia (33°50′22″S, 151°15′17″E)	100	100	1.9e-53	215
24	V9 18S rRNA Colp-25	SRR6930340.139657;sample=SRR6930340	PRJNA408198	Marine sediment	Chowder Bay, Sydney - Australia (33°50′22″S, 151°15′17″E)	100	100	1.9e-53	215
25	V9 18S rRNA Colp-25	SRR6930315.8522;sample=SRR6930315	PRJNA408198	Marine sediment	Chowder Bay, Sydney - Australia (33°50′22″S, 151°15′17″E)	100	100	1.9e-53	215
26	V9 18S rRNA Colp-25	SRR6930281.52259;sample=SRR6930281	PRJNA408198	Marine sediment	Chowder Bay, Sydney - Australia (33°50′22″S, 151°15′17″E)	100	100	1.9e-53	215
27	V9 18S rRNA Colp-25	SRR6930279.29503;sample=SRR6930279	PRJNA408198	Marine sediment	Chowder Bay, Sydney - Australia (33°50′22″S, 151°15′17″E)	100	100	1.9e-53	215
28	V9 18S rRNA Colp-25	SRR6930277.31142;sample=SRR6930277	PRJNA408198	Marine sediment	Chowder Bay, Sydney - Australia (33°50′22″S, 151°15′17″E)	100	100	1.9e-53	215
29	V9 18S rRNA Colp-25	SRR6930277.19201;sample=SRR6930277	PRJNA408198	Marine sediment	Chowder Bay, Sydney - Australia (33°50′22″S, 151°15′17″E)	100	100	1.9e-53	215
30	V9 18S rRNA Colp-25	SRR6930277.16545;sample=SRR6930277	PRJNA408198	Marine sediment	Chowder Bay, Sydney - Australia (33°50′22″S, 151°15′17″E)	100	100	1.9e-53	215
31	V9 18S rRNA Colp-25	SRR6930242.120535;sample=SRR6930242	PRJNA408198	Marine sediment	Chowder Bay, Sydney - Australia (33°50′22″S, 151°15′17″E)	100	100	1.9e-53	215
32	V9 18S rRNA Colp-25	SRR6930242.98637;sample=SRR6930242	PRJNA408198	Marine sediment	Chowder Bay, Sydney - Australia (33°50′22″S, 151°15′17″E)	100	100	1.9e-53	215
33	V9 18S rRNA Colp-25	SRR6930242.3914;sample=SRR6930242	PRJNA408198	Marine sediment	Chowder Bay, Sydney - Australia (33°50′22″S, 151°15′17″E)	100	100	1.9e-53	215
34	V9 18S rRNA Colp-25	SRR6930214.53203;sample=SRR6930214	PRJNA408198	Marine sediment	Chowder Bay, Sydney - Australia (33°50′22″S, 151°15′17″E)	100	100	1.9e-53	215
35	V9 18S rRNA Colp-25	SRR6930477.166397;sample=SRR6930477	PRJNA408198	Marine sediment	Chowder Bay, Sydney - Australia (33°50′22″S, 151°15′17″E)	99.16	100	8.08e-52	210
36	V9 18S rRNA Colp-25	SRR6930429.90358;sample=SRR6930429	PRJNA408198	Marine sediment	Chowder Bay, Sydney - Australia (33°50′22″S, 151°15′17″E)	99.16	100	8.08e-52	210
37	V9 18S rRNA Colp-25	SRR6930370.12700;sample=SRR6930370	PRJNA408198	Marine sediment	Chowder Bay, Sydney - Australia (33°50′22″S, 151°15′17″E)	99.16	100	8.08e-52	210
38	V9 18S rRNA Colp-25	SRR6930352.32490;sample=SRR6930352	PRJNA408198	Marine sediment	Chowder Bay, Sydney - Australia (33°50′22″S, 151°15′17″E)	99.16	100	8.08e-52	210
39	V9 18S rRNA Colp-25	SRR6930340.173904;sample=SRR6930340	PRJNA408198	Marine sediment	Chowder Bay, Sydney - Australia (33°50′22″S, 151°15′17″E)	99.16	100	8.08e-52	210
40	V9 18S rRNA Colp-25	SRR6930314.2981;sample=SRR6930314	PRJNA408198	Marine sediment	Chowder Bay, Sydney - Australia (33°50′22″S, 151°15′17″E)	99.16	100	8.08e-52	210
41	V9 18S rRNA Colp-25	SRR6930281.59034;sample=SRR6930281	PRJNA408198	Marine sediment	Chowder Bay, Sydney - Australia (33°50′22″S, 151°15′17″E)	99.16	100	8.08e-52	210
42	V9 18S rRNA Colp-25	SRR6930277.56146;sample=SRR6930277	PRJNA408198	Marine sediment	Chowder Bay, Sydney - Australia (33°50′22″S, 151°15′17″E)	99.16	100	8.08e-52	210
43	V9 18S rRNA Colp-25	SRR6930244.32094;sample=SRR6930244	PRJNA408198	Marine sediment	Chowder Bay, Sydney - Australia (33°50′22″S, 151°15′17″E)	99.16	100	8.08e-52	210
44	V9 18S rRNA Colp-25	SRR6930242.14963;sample=SRR6930242	PRJNA408198	Marine sediment	Chowder Bay, Sydney - Australia (33°50′22″S, 151°15′17″E)	99.16	100	8.08e-52	210
45	V9 18S rRNA Colp-25	SRR6930476.21321;sample=SRR6930476	PRJNA408198	Marine sediment	Chowder Bay, Sydney - Australia (33°50′22″S, 151°15′17″E)	98.319	100	9.85e-51	206
46	V9 18S rRNA Colp-25	SRR6930434.55461;sample=SRR6930434	PRJNA408198	Marine sediment	Chowder Bay, Sydney - Australia (33°50′22″S, 151°15′17″E)	98.319	100	9.85e-51	206
47	V9 18S rRNA Colp-25	SRR6930394.64472;sample=SRR6930394	PRJNA408198	Marine sediment	Chowder Bay, Sydney - Australia (33°50′22″S, 151°15′17″E)	98.319	100	9.85e-51	206
48	V9 18S rRNA Colp-25	SRR6930366.85630;sample=SRR6930366	PRJNA408198	Marine sediment	Chowder Bay, Sydney - Australia (33°50′22″S, 151°15′17″E)	98.319	100	9.85e-51	206
49	V9 18S rRNA Colp-25	SRR6930278.89092;sample=SRR6930278	PRJNA408198	Marine sediment	Chowder Bay, Sydney - Australia (33°50′22″S, 151°15′17″E)	98.319	100	9.85e-51	206
50	V9 18S rRNA Colp-25	SRR6930478.14361;sample=SRR6930478	PRJNA408198	Marine sediment	Chowder Bay, Sydney - Australia (33°50′22″S, 151°15′17″E)	97.479	100	4.19e-49	201
51	V9 18S rRNA Colp-25	SRR6930371.130597;sample=SRR6930371	PRJNA408198	Marine sediment	Chowder Bay, Sydney - Australia (33°50′22″S, 151°15′17″E)	97.479	100	4.19e-49	201
52	V9 18S rRNA Colp-25	SRR6930309.40033;sample=SRR6930309	PRJNA408198	Marine sediment	Chowder Bay, Sydney - Australia (33°50′22″S, 151°15′17″E)	97.479	100	4.19e-49	201
53	V9 18S rRNA Colp-25	OTU1045984; PRJEB14727	PRJEB14727	Marine sediment	7th Beach, Calvert Island British Columbia - Canada	99.3	94.4	6e-68	257
54	V4 18S rRNA Colp-25	ERR861811.4372;sample=ERR861811	PRJEB9133	Marine sediment	Skagerrak, Olso - Norway (59°16′N, 10°43′E) 2010 Total (BV4_S0010)	98.953	100	0	664
55	V4 18S rRNA Colp-25	ERR3446502.196887;sample=ERR3446502	PRJEB33619	Marine sediment	Marina PQ, Bristol Channel - United Kingdom (51°12'52.4"N, 3°17'48.3"W)	97.368	100	0	641
56	V4 18S rRNA Colp-25	ERR3446502.229059;sample=ERR3446502	PRJEB33619	Marine sediment	Marina PQ, Bristol Channel - United Kingdom (51°12'52.4"N, 3°17'48.3"W)	97.105	100	2.47e-179	636
57	V9 18S rRNA Colp-37	SRR5240843.16167;sample=SRR5240843	PRJNA369575	Water column	Arafura Sea, Torres Strait, Coral Sea - Australia	97.479	100	5.13e-48	197
58	V9 18S rRNA Colp-37	SRR5240843.16166;sample=SRR5240843	PRJNA369575	Water column	Arafura Sea, Torres Strait, Coral Sea - Australia	97.479	100	5.13e-48	197
59	V9 18S rRNA Colp-37	SRR6930477.101743;sample=SRR6930477	PRJNA408198	Marine sediment	Chowder Bay, Sydney - Australia (33°50′22″S, 151°15′17″E)	98.319	100	1.21e-49	203
60	V9 18S rRNA Colp-37	SRR6930474.29827;sample=SRR6930474	PRJNA408198	Marine sediment	Chowder Bay, Sydney - Australia (33°50′22″S, 151°15′17″E)	98.319	100	1.21e-49	203
61	V9 18S rRNA Colp-37	SRR6930474.27646;sample=SRR6930474	PRJNA408198	Marine sediment	Chowder Bay, Sydney - Australia (33°50′22″S, 151°15′17″E)	98.319	100	1.21e-49	203
62	V9 18S rRNA Colp-37	SRR6930474.7199;sample=SRR6930474	PRJNA408198	Marine sediment	Chowder Bay, Sydney - Australia (33°50′22″S, 151°15′17″E)	98.319	100	1.21e-49	203
63	V9 18S rRNA Colp-37	SRR6930456.8234;sample=SRR6930456	PRJNA408198	Marine sediment	Chowder Bay, Sydney - Australia (33°50′22″S, 151°15′17″E)	98.319	100	1.21e-49	203
64	V9 18S rRNA Colp-37	SRR6930433.88919;sample=SRR6930433	PRJNA408198	Marine sediment	Chowder Bay, Sydney - Australia (33°50′22″S, 151°15′17″E)	98.319	100	1.21e-49	203
65	V9 18S rRNA Colp-37	SRR6930429.70739;sample=SRR6930429	PRJNA408198	Marine sediment	Chowder Bay, Sydney - Australia (33°50′22″S, 151°15′17″E)	98.319	100	1.21e-49	203
66	V9 18S rRNA Colp-37	SRR6930399.70297;sample=SRR6930399	PRJNA408198	Marine sediment	Chowder Bay, Sydney - Australia (33°50′22″S, 151°15′17″E)	98.319	100	1.21e-49	203
67	V9 18S rRNA Colp-37	SRR6930392.10441;sample=SRR6930392	PRJNA408198	Marine sediment	Chowder Bay, Sydney - Australia (33°50′22″S, 151°15′17″E)	98.319	100	1.21e-49	203
68	V9 18S rRNA Colp-37	SRR6930372.61109;sample=SRR6930372	PRJNA408198	Marine sediment	Chowder Bay, Sydney - Australia (33°50′22″S, 151°15′17″E)	98.319	100	1.21e-49	203
69	V9 18S rRNA Colp-37	SRR6930371.133419;sample=SRR6930371	PRJNA408198	Marine sediment	Chowder Bay, Sydney - Australia (33°50′22″S, 151°15′17″E)	98.319	100	1.21e-49	203
70	V9 18S rRNA Colp-37	SRR6930371.94736;sample=SRR6930371	PRJNA408198	Marine sediment	Chowder Bay, Sydney - Australia (33°50′22″S, 151°15′17″E)	98.319	100	1.21e-49	203
71	V9 18S rRNA Colp-37	SRR6930371.51171;sample=SRR6930371	PRJNA408198	Marine sediment	Chowder Bay, Sydney - Australia (33°50′22″S, 151°15′17″E)	98.319	100	1.21e-49	203
72	V9 18S rRNA Colp-37	SRR6930371.6985;sample=SRR6930371	PRJNA408198	Marine sediment	Chowder Bay, Sydney - Australia (33°50′22″S, 151°15′17″E)	98.319	100	1.21e-49	203
73	V9 18S rRNA Colp-37	SRR6930370.66164;sample=SRR6930370	PRJNA408198	Marine sediment	Chowder Bay, Sydney - Australia (33°50′22″S, 151°15′17″E)	98.319	100	1.21e-49	203
74	V9 18S rRNA Colp-37	SRR6930370.12700;sample=SRR6930370	PRJNA408198	Marine sediment	Chowder Bay, Sydney - Australia (33°50′22″S, 151°15′17″E)	98.319	100	1.21e-49	203
75	V9 18S rRNA Colp-37	SRR6930352.102982;sample=SRR6930352	PRJNA408198	Marine sediment	Chowder Bay, Sydney - Australia (33°50′22″S, 151°15′17″E)	98.319	100	1.21e-49	203
76	V9 18S rRNA Colp-37	SRR6930352.18034;sample=SRR6930352	PRJNA408198	Marine sediment	Chowder Bay, Sydney - Australia (33°50′22″S, 151°15′17″E)	98.319	100	1.21e-49	203
77	V9 18S rRNA Colp-37	SRR6930352.2470;sample=SRR6930352	PRJNA408198	Marine sediment	Chowder Bay, Sydney - Australia (33°50′22″S, 151°15′17″E)	98.319	100	1.21e-49	203
78	V9 18S rRNA Colp-37	SRR6930347.142877;sample=SRR6930347	PRJNA408198	Marine sediment	Chowder Bay, Sydney - Australia (33°50′22″S, 151°15′17″E)	98.319	100	1.21e-49	203
79	V9 18S rRNA Colp-37	SRR6930342.78209;sample=SRR6930342	PRJNA408198	Marine sediment	Chowder Bay, Sydney - Australia (33°50′22″S, 151°15′17″E)	98.319	100	1.21e-49	203
80	V9 18S rRNA Colp-37	SRR6930342.23009;sample=SRR6930342	PRJNA408198	Marine sediment	Chowder Bay, Sydney - Australia (33°50′22″S, 151°15′17″E)	98.319	100	1.21e-49	203
81	V9 18S rRNA Colp-37	SRR6930340.139657;sample=SRR6930340	PRJNA408198	Marine sediment	Chowder Bay, Sydney - Australia (33°50′22″S, 151°15′17″E)	98.319	100	1.21e-49	203
82	V9 18S rRNA Colp-37	SRR6930315.8522;sample=SRR6930315	PRJNA408198	Marine sediment	Chowder Bay, Sydney - Australia (33°50′22″S, 151°15′17″E)	98.319	100	1.21e-49	203
83	V9 18S rRNA Colp-37	SRR6930281.52259;sample=SRR6930281	PRJNA408198	Marine sediment	Chowder Bay, Sydney - Australia (33°50′22″S, 151°15′17″E)	98.319	100	1.21e-49	203
84	V9 18S rRNA Colp-37	SRR6930279.29503;sample=SRR6930279	PRJNA408198	Marine sediment	Chowder Bay, Sydney - Australia (33°50′22″S, 151°15′17″E)	98.319	100	1.21e-49	203
85	V9 18S rRNA Colp-37	SRR6930277.31142;sample=SRR6930277	PRJNA408198	Marine sediment	Chowder Bay, Sydney - Australia (33°50′22″S, 151°15′17″E)	98.319	100	1.21e-49	203
86	V9 18S rRNA Colp-37	SRR6930277.19201;sample=SRR6930277	PRJNA408198	Marine sediment	Chowder Bay, Sydney - Australia (33°50′22″S, 151°15′17″E)	98.319	100	1.21e-49	203
87	V9 18S rRNA Colp-37	SRR6930277.16545;sample=SRR6930277	PRJNA408198	Marine sediment	Chowder Bay, Sydney - Australia (33°50′22″S, 151°15′17″E)	98.319	100	1.21e-49	203
88	V9 18S rRNA Colp-37	SRR6930242.120535;sample=SRR6930242	PRJNA408198	Marine sediment	Chowder Bay, Sydney - Australia (33°50′22″S, 151°15′17″E)	98.319	100	1.21e-49	203
89	V9 18S rRNA Colp-37	SRR6930242.98637;sample=SRR6930242	PRJNA408198	Marine sediment	Chowder Bay, Sydney - Australia (33°50′22″S, 151°15′17″E)	98.319	100	1.21e-49	203
90	V9 18S rRNA Colp-37	SRR6930242.3914;sample=SRR6930242	PRJNA408198	Marine sediment	Chowder Bay, Sydney - Australia (33°50′22″S, 151°15′17″E)	98.319	100	1.21e-49	203
91	V9 18S rRNA Colp-37	SRR6930214.53203;sample=SRR6930214	PRJNA408198	Marine sediment	Chowder Bay, Sydney - Australia (33°50′22″S, 151°15′17″E)	98.319	100	1.21e-49	203
92	V9 18S rRNA Colp-37	SRR6930347.28081;sample=SRR6930347	PRJNA408198	Marine sediment	Chowder Bay, Sydney - Australia (33°50′22″S, 151°15′17″E)	97.458	100	1.47e-48	199
93	V9 18S rRNA Colp-37	SRR6930342.15102;sample=SRR6930342	PRJNA408198	Marine sediment	Chowder Bay, Sydney - Australia (33°50′22″S, 151°15′17″E)	97.458	100	1.47e-48	199
94	V9 18S rRNA Colp-37	SRR6930279.100459;sample=SRR6930279	PRJNA408198	Marine sediment	Chowder Bay, Sydney - Australia (33°50′22″S, 151°15′17″E)	97.458	100	1.47e-48	199
95	V9 18S rRNA Colp-37	SRR6930279.100450;sample=SRR6930279	PRJNA408198	Marine sediment	Chowder Bay, Sydney - Australia (33°50′22″S, 151°15′17″E)	97.458	100	1.47e-48	199
96	V9 18S rRNA Colp-37	SRR6930279.15811;sample=SRR6930279	PRJNA408198	Marine sediment	Chowder Bay, Sydney - Australia (33°50′22″S, 151°15′17″E)	97.458	100	1.47e-48	199
97	V9 18S rRNA Colp-37	SRR6930244.43709;sample=SRR6930244	PRJNA408198	Marine sediment	Chowder Bay, Sydney - Australia (33°50′22″S, 151°15′17″E)	97.458	100	1.47e-48	199
98	V9 18S rRNA Colp-37	SRR6930244.7904;sample=SRR6930244	PRJNA408198	Marine sediment	Chowder Bay, Sydney - Australia (33°50′22″S, 151°15′17″E)	97.458	100	1.47e-48	199
99	V9 18S rRNA Colp-37	SRR6930477.166397;sample=SRR6930477	PRJNA408198	Marine sediment	Chowder Bay, Sydney - Australia (33°50′22″S, 151°15′17″E)	97.479	100	5.13e-48	197
100	V9 18S rRNA Colp-37	SRR6930429.90358;sample=SRR6930429	PRJNA408198	Marine sediment	Chowder Bay, Sydney - Australia (33°50′22″S, 151°15′17″E)	97.479	100	5.13e-48	197
101	V9 18S rRNA Colp-37	SRR6930352.32490;sample=SRR6930352	PRJNA408198	Marine sediment	Chowder Bay, Sydney - Australia (33°50′22″S, 151°15′17″E)	97.479	100	5.13e-48	197
102	V9 18S rRNA Colp-37	SRR6930340.173904;sample=SRR6930340	PRJNA408198	Marine sediment	Chowder Bay, Sydney - Australia (33°50′22″S, 151°15′17″E)	97.479	100	5.13e-48	197
103	V9 18S rRNA Colp-37	SRR6930314.2981;sample=SRR6930314	PRJNA408198	Marine sediment	Chowder Bay, Sydney - Australia (33°50′22″S, 151°15′17″E)	97.479	100	5.13e-48	197
104	V9 18S rRNA Colp-37	SRR6930281.59034;sample=SRR6930281	PRJNA408198	Marine sediment	Chowder Bay, Sydney - Australia (33°50′22″S, 151°15′17″E)	97.479	100	5.13e-48	197
105	V9 18S rRNA Colp-37	SRR6930277.56146;sample=SRR6930277	PRJNA408198	Marine sediment	Chowder Bay, Sydney - Australia (33°50′22″S, 151°15′17″E)	97.479	100	5.13e-48	197
106	V9 18S rRNA Colp-37	SRR6930244.32094;sample=SRR6930244	PRJNA408198	Marine sediment	Chowder Bay, Sydney - Australia (33°50′22″S, 151°15′17″E)	97.479	100	5.13e-48	197
107	V9 18S rRNA Colp-37	SRR6930242.14963;sample=SRR6930242	PRJNA408198	Marine sediment	Chowder Bay, Sydney - Australia (33°50′22″S, 151°15′17″E)	97.479	100	5.13e-48	197
108	V9 18S rRNA Colp-37	OTU1045984; PRJEB14727	PRJEB14727	Marine sediment	7th Beach, Calvert Island British Columbia - Canada	97.9	95.3	1e-64	246
109	V9 18S rRNA Cur-11	SRR6930347.28081;sample=SRR6930347	PRJNA408198	Marine sediment	Chowder Bay, Sydney - Australia (33°50′22″S, 151°15′17″E)	98.305	100	3.45e-50	205
110	V9 18S rRNA Cur-11	SRR6930342.15102;sample=SRR6930342	PRJNA408198	Marine sediment	Chowder Bay, Sydney - Australia (33°50′22″S, 151°15′17″E)	98.305	100	3.45e-50	205
111	V9 18S rRNA Cur-11	SRR6930279.100459;sample=SRR6930279	PRJNA408198	Marine sediment	Chowder Bay, Sydney - Australia (33°50′22″S, 151°15′17″E)	98.305	100	3.45e-50	205
112	V9 18S rRNA Cur-11	SRR6930279.100450;sample=SRR6930279	PRJNA408198	Marine sediment	Chowder Bay, Sydney - Australia (33°50′22″S, 151°15′17″E)	98.305	100	3.45e-50	205
113	V9 18S rRNA Cur-11	SRR6930279.15811;sample=SRR6930279	PRJNA408198	Marine sediment	Chowder Bay, Sydney - Australia (33°50′22″S, 151°15′17″E)	98.305	100	3.45e-50	205
114	V9 18S rRNA Cur-11	SRR6930244.43709;sample=SRR6930244	PRJNA408198	Marine sediment	Chowder Bay, Sydney - Australia (33°50′22″S, 151°15′17″E)	98.305	100	3.45e-50	205
115	V9 18S rRNA Cur-11	SRR6930244.7904;sample=SRR6930244	PRJNA408198	Marine sediment	Chowder Bay, Sydney - Australia (33°50′22″S, 151°15′17″E)	98.305	100	3.45e-50	205
116	V9 18S rRNA Cur-11	SRR6930370.12700;sample=SRR6930370	PRJNA408198	Marine sediment	Chowder Bay, Sydney - Australia (33°50′22″S, 151°15′17″E)	98.319	100	1.21e-49	203
117	V9 18S rRNA Cur-11	SRR6930372.41017;sample=SRR6930372	PRJNA408198	Marine sediment	Chowder Bay, Sydney - Australia (33°50′22″S, 151°15′17″E)	97.458	100	1.47e-48	199
118	V9 18S rRNA Cur-11	SRR6930208.33766;sample=SRR6930208	PRJNA408198	Marine sediment	Chowder Bay, Sydney - Australia (33°50′22″S, 151°15′17″E)	97.458	100	1.47e-48	199
119	V9 18S rRNA Cur-11	SRR6930477.101743;sample=SRR6930477	PRJNA408198	Marine sediment	Chowder Bay, Sydney - Australia (33°50′22″S, 151°15′17″E)	97.479	100	5.13e-48	197
120	V9 18S rRNA Cur-11	SRR6930474.29827;sample=SRR6930474	PRJNA408198	Marine sediment	Chowder Bay, Sydney - Australia (33°50′22″S, 151°15′17″E)	97.479	100	5.13e-48	197
121	V9 18S rRNA Cur-11	SRR6930474.27646;sample=SRR6930474	PRJNA408198	Marine sediment	Chowder Bay, Sydney - Australia (33°50′22″S, 151°15′17″E)	97.479	100	5.13e-48	197
122	V9 18S rRNA Cur-11	SRR6930474.7199;sample=SRR6930474	PRJNA408198	Marine sediment	Chowder Bay, Sydney - Australia (33°50′22″S, 151°15′17″E)	97.479	100	5.13e-48	197
123	V9 18S rRNA Cur-11	SRR6930456.8234;sample=SRR6930456	PRJNA408198	Marine sediment	Chowder Bay, Sydney - Australia (33°50′22″S, 151°15′17″E)	97.479	100	5.13e-48	197
124	V9 18S rRNA Cur-11	SRR6930433.88919;sample=SRR6930433	PRJNA408198	Marine sediment	Chowder Bay, Sydney - Australia (33°50′22″S, 151°15′17″E)	97.479	100	5.13e-48	197
125	V9 18S rRNA Cur-11	SRR6930429.70739;sample=SRR6930429	PRJNA408198	Marine sediment	Chowder Bay, Sydney - Australia (33°50′22″S, 151°15′17″E)	97.479	100	5.13e-48	197
126	V9 18S rRNA Cur-11	SRR6930399.70297;sample=SRR6930399	PRJNA408198	Marine sediment	Chowder Bay, Sydney - Australia (33°50′22″S, 151°15′17″E)	97.479	100	5.13e-48	197
127	V9 18S rRNA Cur-11	SRR6930392.10441;sample=SRR6930392	PRJNA408198	Marine sediment	Chowder Bay, Sydney - Australia (33°50′22″S, 151°15′17″E)	97.479	100	5.13e-48	197
128	V9 18S rRNA Cur-11	SRR6930372.61109;sample=SRR6930372	PRJNA408198	Marine sediment	Chowder Bay, Sydney - Australia (33°50′22″S, 151°15′17″E)	97.479	100	5.13e-48	197
129	V9 18S rRNA Cur-11	SRR6930371.133419;sample=SRR6930371	PRJNA408198	Marine sediment	Chowder Bay, Sydney - Australia (33°50′22″S, 151°15′17″E)	97.479	100	5.13e-48	197
130	V9 18S rRNA Cur-11	SRR6930371.94736;sample=SRR6930371	PRJNA408198	Marine sediment	Chowder Bay, Sydney - Australia (33°50′22″S, 151°15′17″E)	97.479	100	5.13e-48	197
131	V9 18S rRNA Cur-11	SRR6930371.51171;sample=SRR6930371	PRJNA408198	Marine sediment	Chowder Bay, Sydney - Australia (33°50′22″S, 151°15′17″E)	97.479	100	5.13e-48	197
132	V9 18S rRNA Cur-11	SRR6930371.6985;sample=SRR6930371	PRJNA408198	Marine sediment	Chowder Bay, Sydney - Australia (33°50′22″S, 151°15′17″E)	97.479	100	5.13e-48	197
133	V9 18S rRNA Cur-11	SRR6930370.66164;sample=SRR6930370	PRJNA408198	Marine sediment	Chowder Bay, Sydney - Australia (33°50′22″S, 151°15′17″E)	97.479	100	5.13e-48	197
134	V9 18S rRNA Cur-11	SRR6930352.102982;sample=SRR6930352	PRJNA408198	Marine sediment	Chowder Bay, Sydney - Australia (33°50′22″S, 151°15′17″E)	97.479	100	5.13e-48	197
135	V9 18S rRNA Cur-11	SRR6930352.18034;sample=SRR6930352	PRJNA408198	Marine sediment	Chowder Bay, Sydney - Australia (33°50′22″S, 151°15′17″E)	97.479	100	5.13e-48	197
136	V9 18S rRNA Cur-11	SRR6930352.2470;sample=SRR6930352	PRJNA408198	Marine sediment	Chowder Bay, Sydney - Australia (33°50′22″S, 151°15′17″E)	97.479	100	5.13e-48	197
137	V9 18S rRNA Cur-11	SRR6930347.142877;sample=SRR6930347	PRJNA408198	Marine sediment	Chowder Bay, Sydney - Australia (33°50′22″S, 151°15′17″E)	97.479	100	5.13e-48	197
138	V9 18S rRNA Cur-11	SRR6930342.78209;sample=SRR6930342	PRJNA408198	Marine sediment	Chowder Bay, Sydney - Australia (33°50′22″S, 151°15′17″E)	97.479	100	5.13e-48	197
139	V9 18S rRNA Cur-11	SRR6930342.23009;sample=SRR6930342	PRJNA408198	Marine sediment	Chowder Bay, Sydney - Australia (33°50′22″S, 151°15′17″E)	97.479	100	5.13e-48	197
140	V9 18S rRNA Cur-11	SRR6930340.139657;sample=SRR6930340	PRJNA408198	Marine sediment	Chowder Bay, Sydney - Australia (33°50′22″S, 151°15′17″E)	97.479	100	5.13e-48	197
141	V9 18S rRNA Cur-11	SRR6930315.8522;sample=SRR6930315	PRJNA408198	Marine sediment	Chowder Bay, Sydney - Australia (33°50′22″S, 151°15′17″E)	97.479	100	5.13e-48	197
142	V9 18S rRNA Cur-11	SRR6930281.52259;sample=SRR6930281	PRJNA408198	Marine sediment	Chowder Bay, Sydney - Australia (33°50′22″S, 151°15′17″E)	97.479	100	5.13e-48	197
143	V9 18S rRNA Cur-11	SRR6930279.29503;sample=SRR6930279	PRJNA408198	Marine sediment	Chowder Bay, Sydney - Australia (33°50′22″S, 151°15′17″E)	97.479	100	5.13e-48	197
144	V9 18S rRNA Cur-11	SRR6930277.31142;sample=SRR6930277	PRJNA408198	Marine sediment	Chowder Bay, Sydney - Australia (33°50′22″S, 151°15′17″E)	97.479	100	5.13e-48	197
145	V9 18S rRNA Cur-11	SRR6930277.19201;sample=SRR6930277	PRJNA408198	Marine sediment	Chowder Bay, Sydney - Australia (33°50′22″S, 151°15′17″E)	97.479	100	5.13e-48	197
146	V9 18S rRNA Cur-11	SRR6930277.16545;sample=SRR6930277	PRJNA408198	Marine sediment	Chowder Bay, Sydney - Australia (33°50′22″S, 151°15′17″E)	97.479	100	5.13e-48	197
147	V9 18S rRNA Cur-11	SRR6930242.120535;sample=SRR6930242	PRJNA408198	Marine sediment	Chowder Bay, Sydney - Australia (33°50′22″S, 151°15′17″E)	97.479	100	5.13e-48	197
148	V9 18S rRNA Cur-11	SRR6930242.98637;sample=SRR6930242	PRJNA408198	Marine sediment	Chowder Bay, Sydney - Australia (33°50′22″S, 151°15′17″E)	97.479	100	5.13e-48	197
149	V9 18S rRNA Cur-11	SRR6930242.3914;sample=SRR6930242	PRJNA408198	Marine sediment	Chowder Bay, Sydney - Australia (33°50′22″S, 151°15′17″E)	97.479	100	5.13e-48	197
150	V9 18S rRNA Cur-11	SRR6930214.53203;sample=SRR6930214	PRJNA408198	Marine sediment	Chowder Bay, Sydney - Australia (33°50′22″S, 151°15′17″E)	97.479	100	5.13e-48	197
151	V4 18S rRNA Cur-11	ERR861916.14094;sample=ERR861916	PRJEB9133	Marine sediment	Naples - Italy 2009 (40°48′N, 14°15′E) BV4_S014, NB348 S0147	98.148	99	0	643
152	V4 18S rRNA Cur-11	ERR3446502.196887;sample=ERR3446502	PRJEB33619	Marine sediment	Marina PQ, Bristol Channel - United Kingdom (51°12'52.4"N, 3°17'48.3"W)	97.375	100	2.03e-180	639
153	V4 18S rRNA Cur-11	ERR3446502.229059;sample=ERR3446502	PRJEB33619	Marine sediment	Marina PQ, Bristol Channel - United Kingdom (51°12'52.4"N, 3°17'48.3"W)	97.113	100	8.65e-179	634

## Sheet: Amplicon studies searched
Count	Data deposit type	Accession or file	Data location	Publication	Environment/Host	Geographical Location	Samples	Sites	Region SSU rRNA	SSU rRNA Raw Reads	Number of SSU rRNA OTU or ASVs clustered from original paper	Number of unclustered hits in eleftherids	Number clustered hits in eleftherids	unclustered hits in eleftherids	clustered hits in eleftherids	Comments
1	NCBI BioProject	PRJNA408198	https://www.ncbi.nlm.nih.gov/bioproject/PRJNA408198	Birrer, SC. et al. Interactive effects of multiple stressors revealed by sequencing total (DNA) and active (RNA) components of experimental sediment microbial communities. Sci Total Environ. Oct 1;637-638:1383-1394. (2018).	Marine sediment	Sydney Australia	132	NA	V9	13593837	1313	59	16	SRR6930477.101743;sample=SRR6930477,SRR6930474.29827;sample=SRR6930474,SRR6930474.27646;sample=SRR6930474,SRR6930474.7199;sample=SRR6930474,SRR6930456.8234;sample=SRR6930456,SRR6930433.88919;sample=SRR6930433,SRR6930429.70739;sample=SRR6930429,SRR6930399.70297;sample=SRR6930399,SRR6930392.10441;sample=SRR6930392,SRR6930372.61109;sample=SRR6930372,SRR6930371.133419;sample=SRR6930371,SRR6930371.947…	SRR6930208.33766;sample=SRR6930208,SRR6930242.14963;sample=SRR6930242,SRR6930244.32094;sample=SRR6930244,SRR6930277.56146;sample=SRR6930277,SRR6930278.89092;sample=SRR6930278,SRR6930281.59034;sample=SRR6930281,SRR6930314.2981;sample=SRR6930314,SRR6930340.173904;sample=SRR6930340,SRR6930352.32490;sample=SRR6930352,SRR6930366.85630;sample=SRR6930366,SRR6930370.12700;sample=SRR6930370,SRR6930372.410…	OTU value is an average of the SSU rRNA OTUs from SSU rRNA samples. OTU clustering across all samples is not available
2	NCBI BioProject	PRJEB9133	https://www.ncbi.nlm.nih.gov/bioproject/PRJEB9133	Massana, R. et al. Marine protist diversity in European coastal waters and sediments as revealed by high-throughput sequencing. Environ. Microbiol. 17, 4035–4049 (2015).	Marine planktonic (81) and sediment (14)	BioMarKs Project - Blanes Spain, Gijon Spain, Naples Italy, Oslo Norway, Roscoff France, Varna Bulgaria (sediment, surface, DCM)	95	6	V4	1477041	15295	2	2	ERR861811.4372;sample=ERR861811,ERR861916.14094;sample=ERR861916	ERR861811.4372;sample=ERR861811,ERR861916.14094;sample=ERR861916
3	NCBI BioProject	PRJEB33619	https://www.ncbi.nlm.nih.gov/bioproject/PRJEB33619	Holman, LE. et al.. Detection of introduced and resident marine species using environmental DNA metabarcoding of sediment and water. Sci Rep. 2019 Aug 9;9(1):11559. (2019).	Marine sediment and water of artifical coastal sites	United Kingdom	42	24	V4	7547310	2433	2	1	ERR3446502.196887;sample=ERR3446502,ERR3446502.229059;sample=ERR3446502	ERR3446502.196887;sample=ERR3446502
4	NCBI BioProject	PRJNA369575	https://www.ncbi.nlm.nih.gov/bioproject/PRJNA369575	NA	Coral reef surface waters	Arafura Sea, Torres Strait, Coral Sea - Australia	46	46	V9	856467	NA	2	1	SRR5240843.16167;sample=SRR5240843,SRR5240843.16166;sample=SRR5240843	SRR5240843.16166;sample=SRR5240843
5	NCBI BioProject	PRJEB14727	https://www.ncbi.nlm.nih.gov/bioproject/PRJEB14727	Okamoto, N., Keeling, P. J., Leander, B.S. & Tai V. (2022) Molecular Ecology. Microbial communities in sandy beaches from the three domains of life differ by microhabitat and intertidal location. [almost in press]	Marine sediment and water	Calvert Island, British Columbia Canada	112	5	V4 & V9	34154122	7142 V4 OTU, 92,193 V9 OTU	1	1	OTU1045984; PRJEB14727	OTU1045984; PRJEB14727
6	NCBI BioProject	PRJNA247504	https://www.ncbi.nlm.nih.gov/bioproject/PRJNA247504	Brannock, PM. et al. High-throughput sequencing characterizes intertidal meiofaunal communities in Northern Gulf of Mexico (Dauphin Island and Mobile Bay, Alabama). Biol Bull. 227(2):161-174. (2014).	Intertidal sediments	﻿Dauphin Island and in Mobile Bay, Alabama	70	5	V9	24381423	98765	0	0
7	Figshare	Figshare: doi:10.6084/m9.figshare.4993667 FASTA FILE: Nascimento_2018_seqs_fwd_revtrim_RCall_rmorphans.fna	https://figshare.com/articles/dataset/Sample_size_effects_on_the_assessment_of_eukaryotic_diversity_and_community_structure_in_aquatic_sediments_using_high-throughput_sequencing/4993667	Nascimento, FJA. et al. Sample size effects on the assessment of eukaryotic diversity and community structure in aquatic sediments using high-throughput sequencing. Sci Rep. Aug 6;8(1):11737. (2018).	Marine silt, muddy, sediment	Northern Baltic Sea, Sweden	25	5	V4	10320000	10220	0	0
8	NCBI BioProject	PRJNA308164	https://www.ncbi.nlm.nih.gov/bioproject/PRJNA308164	Pearman, JK. et al. Please mind the gap – Visual census and cryptic biodiversity assessment at central Red Sea coral reefs. Mar Environ Res 118: 20–30. (2016).	Coral reef (ARMS)	Red Sea	27	3	V4	9609425	1700	0	0
9	NCBI BioProject	PRJEB22033	https://www.ncbi.nlm.nih.gov/bioproject/PRJEB22033	Chaib De Mares, M et al. Host Specificity for Bacterial, Archaeal and Fungal Communities Determined for High- and Low-Microbial Abundance Sponge Species in Two Genera. Front Microbiol 8: 2560. (2017).	Sponges	Mediterranean Sea/Caribbean Sea	18	3	V1-V3	8009549	3517	0	0			OTU value excludes OTUs taxonomically identified as sponge
10	NCBI BioProject	PRJNA319725	https://www.ncbi.nlm.nih.gov/bioproject/PRJNA319725	Marcelino, VR. et al. Multi-marker metabarcoding of coral skeletons reveals a rich microbiome and diverse evolutionary origins of endolithic algae. Sci Rep 6: 31508. (2016).	Coral skeletons	Australia/Papua New Guinea	182	4	NA	4102867	406	0	0
11	NCBI BioProject	PRJNA396681	https://www.ncbi.nlm.nih.gov/bioproject/PRJNA396681	Heger, TJ. et al. High-throughput environmental sequencing reveals high diversity of litter and moss associated protist communities along a gradient of drainage and tree productivity. Environ Microbiol 20: 1185–1203. (2018).	Soil	British Columbia, Canada	36	4	V4	3007330	3262	0	0
12	NCBI BioProject	PRJNA692629	https://www.ncbi.nlm.nih.gov/bioproject/PRJNA692629	Mount, AS. et al. Three-Dimensional Molecular Cartography of the Caribbean Reef-Building Coral Orbicella. Front. Mar. Sci. 8(April), 1–22. (2021).	Coral	Curaçao	15	2	V4	2972176	541	0	0
13	NCBI BioProject	PRJNA632873	https://www.ncbi.nlm.nih.gov/bioproject/PRJNA632873	Rojas-Jimenez, K. Fungal Communities in Sediments Along a Depth Gradient in the Eastern Tropical Pacific. Front Microbiol. (2020).	Marine sediment	Costa Rica	40	16	V7-V8	2746436	787	0	0			ASV value only includes ASVs taxonomically identified as fungal
14	NCBI BioProject	PRJEB36469	https://www.ncbi.nlm.nih.gov/bioproject/PRJEB36469	Obiol, A. et al. A metagenomic assessment of microbial eukaryotic diversity in the global ocean. Mol. Ecol. Resour. 20, 718–731 (2020).	Surface, DCM, mesopelagic and bathypelagic	Global oceans (Malaspina Project)	46	6	V4 & V9	2365347	6037 V4 ASV, 3,31- V9 ASV	0	0
15	NCBI BioProject	PRJNA287634	https://www.ncbi.nlm.nih.gov/bioproject/PRJNA287634	Rodríguez-Marconi, S. et al. Characterization of Bacterial, Archaeal and Eukaryote Symbionts from Antarctic Sponges Reveals a High Diversity at a Three-Domain Level and a Particular Signature for This Ecosystem. PloS one, 10(9) (2015).	Sponges	Antarctica	18	2	V9	2288470	2855	0	0
16	NCBI BioProject	PRJNA359378	https://www.ncbi.nlm.nih.gov/bioproject/PRJNA359378	Xie, Y. et al. Ecogenomic responses of benthic communities under multiple stressors along the marine and adjacent riverine areas of northern Bohai Sea, China. Chemosphere. Apr;172:166-174. (2017).	Marine sediment	North Bohai Sea	10	10	V9	2179742	12416	0	0
17	NCBI BioProject	PRJNA362750	https://www.ncbi.nlm.nih.gov/bioproject/PRJNA362750	Zhang, W. et al. The diversity and biogeography of abundant and rare intertidal marine microeukaryotes explained by environment and dispersal limitation. Environ Microbiol. Feb;20(2):462-476. (2018).	Intertidal sediment	USA, China	36	12	V9	1232604	12890	0	0
18	NCBI BioProject	PRJNA531674	https://www.ncbi.nlm.nih.gov/bioproject/PRJNA531674	Reñé, A. et al. Performance of the melting seawater-ice elution method on the metabarcoding characterization of benthic protist communities. Environ Microbiol Rep. Jun;12(3):314-323. (2020).	Coastal sediment	Mediterranian Sea	72	18	V4	1146912	12518	0	0
19	NCBI BioProject	PRJNA222539	https://www.ncbi.nlm.nih.gov/bioproject/PRJNA222539	Wang, Y. et al. Diversity and distribution of eukaryotic microbes in and around a brine pool adjacent to the Thuwal cold seeps in the Red Sea. Front Microbiol 5: 37. (2014).	Microbial mats, sediments and water	Red Sea	7	1	V1-V3	147273	1045	0	0
20	NCBI BioProject	PRJNA193567	https://www.ncbi.nlm.nih.gov/bioproject/PRJNA193567	Šlapeta, J. et al. Combined amplicon pyrosequencing assays reveal presence of the apicomplexan; (cf. Gemmocystis cylindrus) and Chromera velia on the Great Barrier Reef, Australia. PLoS One 8: e76095. (2013).	Coral	Great Barrier Reef, Australia	4	1	V1-V4	70855	285	0	0
21	NCBI SRA	SRX147857	https://www.ncbi.nlm.nih.gov/sra/SRX147857	NA	Sponges	NA	3	2	NA	25811	NA	0	0
22	NCBI BioProject	PRJNA200539	https://www.ncbi.nlm.nih.gov/bioproject/PRJNA200539	Wang, Y. et al. Optimal Eukaryotic 18S and Universal 16S/18S Ribosomal RNA Primers and Their Application in a Study of Symbiosis. PLoS One 9: e90053. (2014).	Sponges	Red Sea	4	NA	V4-V8	11325	300	0	0
23	European Nucleotide Archive	ENA: AM072559 to AM072576	https://www.ebi.ac.uk/ena/browser/view/AM072559	Wilms, R. et al. Specific bacterial, archaeal, and eukaryotic communities in tidal-flat sediments along a vertical profile of several meters. Appl Environ Microbiol. Apr;72(4):2756-64. (2006).	Intertidal sediment	Northern Sea (island of Spiekeroog)	12	4	V1-V3	18	NA	0	0
Total sequences	106,971,536 sequence
Total letters	23,328,719,869 total letters
