# Supplementary material for: Multiple parallel origins of parasitic Marine Alveolates
Source: Research Square preprint supplement (doi:10.21203/rs.3.rs-1472581/v2), 2023-05-01
Supplement: Supplementary file 2 [file 67f7aff84cba04ab62b55609.xlsx]

## Sheet: Colp-37
Putative plastid-targeted proteins (colored segments within sequences indicate transmembrane regions within N-terminal extensions)
Process	Homolog	Top blastp hit (nr)	Top blastp hit accession	Expect value	Protein sequence (may be incomplete)
Isoprenoid biosynthesis	Dxs	dxs [Symbiodinium natans]	CAE7205389.1	0	VLDRVNSPQDVQQLDAAELPQLARDIRETLLRAVNRTGGHLGSGLGVVELTIALHRVFSSPRDKIVWDVAHQVYPHKLLTGRKDRIATLRTKGGLSGFAKRAESVHDPFGAGHSSTSVSAAQGYAAGRDLLKKIGDPRAGDIGHCVAVIGDGAITGGMAWEALNHSGGDRTKMIVILNDNQQVSLPTHYNNVRKPIGALSQAFSTTRAASVAEAASSQLFGELRNAAKDWVRRNVPASLQPLAQKADEFLRDVVRPAGSKGLLFEELGYYYVGPIDGHNIETLTHVLDNIKRQHENGTLTRPAFIHVVTENGKGFTPAEGALDKLHAVTPGYLAKHAPHAHDEDVTVPQLPEKTPPLTKVMADALVDLAKRDPRICAITAAMPGGSGVGIFEKAFPERT…
Isoprenoid biosynthesis	IspD	hypothetical protein AMS15_03220 [Planctomycetes bacterium DG_23]	KPJ62673.1	7e-24	SERITLVVVHDAARPIFDELALTRAVRKAEETGAAILAMSPVDTVHATDSKRRIAGTLDRRALALALTPQVFSRALLDQAHAVLGAENYADDAALVHAAGFPVALVASAGGNLKITNAEDRALVDALLTARGEA
Isoprenoid biosynthesis	IspF	2-C-methyl-D-erythritol 2,4-cyclodiphosphate synthase [Rhodopirellula sp.]	NQV24247.1	1e-37	MPRRRAHARALAALAAGALLLAPPALLASLRGAQLRVGHAYDIHRMFRAAARGERNPRPLRLGGVLVSDEFQVDAHSDGDVVFHTVTDALLGACTLGDLGDLFPDTDPRWEGADSADLLRAAARAAWEEAACTATGADVTVVLQRPHAAHLKATIRASVAAVLGVAHDRVGLKLRTKEGLGAVGAAEAVEAYAVVTATGH
Isoprenoid biosynthesis	IspG	unnamed protein product [Vitrella brassicaformis CCMP3155]	CEL93656.1	3e-58	CCRRRWAHCPSSPARARRAPVLFWLQHTGSSADATLATGGAVLGAALMDEFADGVCWDTQFPREDELPGGKPSAGQAELADVERARQATFSLLQACRLRSVRTEFISCPSCGRTLFNIQEVTDRIRQKTGHLPGVKIAVMGCIVNGPDEMADADFGYVGSGPGLVDLYVGREVAVRAVKEAVAVDRLVELIKKHGRWVDPGEAEE
FeS cluster biosynthesis	SufC	Fe-S cluster assembly ATPase SufC [Erysipelotrichaceae bacterium]	MBQ7891687.1	3e-37	MGLATVRPARGLALALAAGALFAAASLRARRSVPATPPAAAPLDLRSVSVSVRGGRRIVQELDLRVEANEVVVLSGPNGCGKSSLLRALAGDPGYTLAGRATLAGSIDLARASPEERALAGLYATFQSPPELAGVSNLELARAMRRARGGDAARIEQELASAVAAFGAPTQRQDVERFLAQNVNAGSGGERKRGELVHMRLAQPLRVALLDEIDSGLDADARTAVALLLSGLQRERGCGLLVVTHSAEFAELLRAEARGRFRRVEMSAGGALREVR
FeS cluster biosynthesis	PetH	benzoyl-CoA 2,3-epoxidase subunit BoxA [Achromobacter animicus]	WP_175186271.1	2e-35	IEARLPWVFGAALWLYFLWPRNSSAARRSVAVAPVGTASSSRPLAVVRLHVPEAPGARKGASSTRDPPSSPRPGGASRGDGARQSHAADEQRPSATPRQAEQRPLGAVAPSGKPMAVAKARRPQFVPKAPLRATVQEVRQLTPADELGSAIFHIRIAHGGRLRFDPGQSVGVLPPGGQPQRLYSIASAGPEELALCVRRVVKGDGATGSASGLLTSASPGTEVHLTGAYGHELALPQSWGTDGSRLVCLGTGTGLAPFRGFVQELRKRRAGRARPPVPPLVLYVGARSEAELPYREFWRQAQKDGLVELHQALSREPGRPKVYVQHLLAAHAEKLRSLVAEPSTHIYVCGKKGLSAALGELDWWPPLRAALKQQKRLHMEVY
Other proteins
Process	Homolog	Top blastp hit (nr)	Top blastp hit accession	Expect value	Protein sequence (may be incomplete)
Heme biosynthesis	ALAS	5-aminolevulinate synthase [Alphaproteobacteria bacterium]	RME94288.1	3e-37	GINAEYMGQQRAAQLKTMMRDAGLPLMENPSHIVPVRVGDPVKCKALTDALLFRHNIYLQPINYPTVPKGTERVRITPGPLHSEADLRQLMTALDTEWTRLELPRELSAYDGF
Heme biosynthesis	HemB	Delta-aminolevulinic acid dehydratase, active site [Phytophthora cactorum]	KAF1792426.1	7e-46	VFVTARAEDKPIAGFAPNVQWGAGADWQYASLSAHLAQLEAKGLRSVMLFGVVDGSTKDAVGSAGDARDTPVCRALAALARANPALQLCADVCLCEYTSHGHCGVLCVESTFQGDRKRYQQPVAAGGVALRAAARDAAEGADILLVKPSLFYGDLVHRLSAAHPELPVAVYVVSGEYKMLYDYGQQTGTMKEVVLEAHLSMLRAGARVLVTYFAPFILDRL
Heme biosynthesis	HemC	HemC [Hematodinium sp. SG-2015]	AKG25420.1	8e-68	MPPLFRLGTRKSELALWQTRHCRRLLRQAAAEPLWVVLCAGASFGDLHLKQHLAQLGETGLFTKELEVDLLARATDLAVHSLKDMPTTLPAELLAGVTERGDPRDCLCPPRAAELPAHIRAGDAPLAELLAVLPHGATVGTSSLRREALLRQYRPDIQTAVVRGNVQTRLRKLDQGHEGVRFDALLLAKVGLERVDLGHRVDVPLPPAAWPHCVSQGALGLEAHAENARARALARQISHQPTLLAASAERALLHKLEGGCQIAMGVASTAAEDRGGVALTLKCTLLDHDAKSATVIEEAPALCAGMDDALALGQRVADAVLARGGRTIVGAATEKRAITYGQA
Heme biosynthesis	HemE	hypothetical protein FOL47_008336 [Perkinsus chesapeaki]	KAF4675025.1	8e-52	LLSYMIEGGGSKTWARSRAFIATFPQLTKDLLEAIADACIEYLSRQVSIGNCSAIQVFETNGGELSVDVYNEFALPPFLRIAAELRRRHPVLPLLAFPKDVSTTRTLPVFNTSDYDGISLSWKYGIEEACLALPNKAVQGNLDPALLYLPPEQIAAEVVKMKQRFVECGKDGRHICNLGHGMMPDHAVEAAGAFVAGVKL
Fatty acid biosynthesis	ACC	ACC1 [Symbiodinium natans]	CAE7605731.1	0	VPAWSLLGAALAQVEERDSGSGSPAGAPPAKPTSLFLLMLEEEIPKQAKMLTRRHQDRSARSHHKLVAQMEQFSPRATAAGDEPPPEDAIASYARQLLNDSLRVLEDSDIREITLIVPRLGASSERFLYFQFTRQRHFEFVETPLYRHVRPSFVTLMELETLLEKDSVARVPQSLNRHTECYVVKHNGQSHVTVRAVRLARGGSHARGLDKVPPRVGLMLDEIERAMLDPLCVTAQPQYVQLYLNFIATPIDIAPDEVLADFPAVVAEITARYGERLMRSRVQELVVRVQLEKPPHDVVRLVASSLRGGVFDPAAYIEWVSPTTGCVTRAEPLQLRSQQHGEAPLAVAVDDATEQALRAKRDTARRAGTTYIYDFVELIRKAAGRMLSADAAAPSGSVS…
Chromatin organization	DVNP	unnamed protein product [Polarella glacialis]	CAE8602927.1	5e-16	INAEYMGSAMKKTTMKKKAAKKPTMKRAMKKVSTIAKGRLAKVMVLRGSKAKTTGGLKASDLTKSKSGKVVSKKKSAQGKKSKWIKAVAAARTALKIKGF
Chromatin organization	DVNP	dinoflagellate viral nucleoprotein DVNP.12 [Hematodinium sp. SG-2012]	AFY23234.1	6e-25	KSAMKKTTMKKSAMKKTAMKKSAMKKKSVMKKKAVMKATMKRAMKKVSTIAKGRLAKVMVLRGSKAKTTGGLKASDLTKNKNGRVVSKKRSAAGKKSKWIQACNKARSALKIKGFAVIGGKTQQGQALLKKARSFYKA
Chromatin organization	DVNP	dinoflagellate viral nucleoprotein DVNP.12 [Hematodinium sp. SG-2012]	AFY23234.1	5e-25	YMGYQRRVHGGTRCISLHTLTMVAKAMKTSAMKKTMKSAMKTTMKKSAMKKTAMKKSAMKKKSVMKKKAVMKATMKRAMKKVSTIAKGRLAKVMVLRGSKAKTTGGLKASDLTKNKNGRVVSKKRSAAGKKSKWIQACNKARSALKIKGFAVIGGKTAQGQALLKKARSFYKA
Chromatin organization	DVNP	dinoflagellate viral nucleoprotein DVNP.13 [Hematodinium sp. SG-2012]	AFY23224.1	5e-28	TMVAKAMKTSAMKKTMKAAMKTVMKKKSAMKKTTMKKKAAKKPTMKRAMKKVSTIAKGRLAKVMVLRGSKAKTTGGLKASDLTKSKSGKVVSKKKSAQGKKSKWIKAVAAARTALKIKGFAVIGGKTAQGQALLKKARSFYKA
Chromatin organization	DVNP	dinoflagellate viral nucleoprotein DVNP.13 [Hematodinium sp. SG-2012]	AFY23224.1	3e-18	KKSAMKKKTTKKVMKKATMKRAMKKVSTIAKGRLAKVMVLRGSKAKTTGGLKASDLTKSKSGKVVSKKKSAQGKKSKWIKACTAARAALKIKGFAVIGGKT
Chromatin organization	DVNP	dinoflagellate viral nucleoprotein DVNP.12 [Hematodinium sp. SG-2012]	AFY23234.1	9e-26	INAEYMGAQERALAMAAMKSGTKAATAKSSRKSVKKTAKAAKPMRKAMRVSKVASGRLAKVLVLRGSKARTTGGLKATDLTRNKNGRVVSKKRSAQGKKSKWIQACNKARSALKIKGFAAIGGKTSQGQALLQKARSFYKA
Chromatin organization	DVNP	dinoflagellate viral nucleoprotein DVNP.13 [Hematodinium sp. SG-2012]	AFY23224.1	2e-26	MKKSAMKTTMKKSAMKKTAKKPAMKKKAVMKATMKRAMKKVSTIAKGRLAKVMVLRGSKAKTTGGLKASDLTKSKSGKVVSKKKSAQGKKSKWIKACTAARAALKIKGFAVIGGKTQQGQALLKKARSFYKA
Chromatin organization	DVNP	unnamed protein product [Amoebophrya sp. A25]	CAD7928963.1	1e-11	AEYMGEAAPAKRPVGRPPKEAAKRPRGRPRKVRPRGRPRKVRPRGRPPKAAAKRPVGRPPKPATEKTVLARTDTSHYRAKVFRNPALRTSGGLTSDDLRRNRRGQIVSEVVSERAKEFAWPKAVVRARAELGITGFLPVGGRTAAGQQLL
Chromatin organization	DVNP	unnamed protein product [Polarella glacialis]	CAE8602927.1	1e-18	KSAMKKKTTKKVMKKATMKRAMKKVSTIAKGRLAKVMVLRGSRAKTTGGLKASDLTKSKSGKVVSKKKSAQGKKSKWIKAVAAARTALKIKGFAVIGGKT
Chromatin organization	DVNP	dinoflagellate viral nucleoprotein DVNP.13 [Hematodinium sp. SG-2012]	AFY23224.1	2e-23	INAEYMGAQGATFSRSTTMAAMKGMKKASSMKVMKTAKKSAMKKTTMKKSAMKKSMKKAVMKATMKRAMKKVSTIAKGRLAKVMVLRGSKAKTTGGLKASDLTKSKAGKVVWKKTSAQGKKSKWIKAGQAARAALKSKGFAVSGGKTQQGEALLKKARSLYKK
Chromatin organization	DVNP	dinoflagellate viral nucleoprotein DVNP.13 [Hematodinium sp. SG-2012]	AFY23224.1	4e-27	MKKSAMKTTMKKSAMKKTAKKPAMKKKAVMKATMKRAMKKVSTIAKGRLAKVMVLRGSKAKTTGGLKASDLTKSKSGKVVSKKKSAQGKKSKWIKAVAAARTALKIKGFAVIGGKTQQGQALLKKARSFYKA
Chromatin organization	DVNP	dinoflagellate viral nucleoprotein DVNP.13 [Hematodinium sp. SG-2012]	AFY23224.1	1e-23	INAEYMGAQGAPFSRSTTMAAMKAAKKSSAMKVMKTAKKSAMKKTTMKKSAMKKSMKKAVMKATMKRAMKKVSTIAKGRLAKVMVLRGSKAKTTGGLKASDLTKSKAGKVVWKKTSAQGKKSKWIKAGQAARAALKSKGFAVSGGKTQQGEALLKKARSLYKK
Chromatin organization	DVNP	dinoflagellate viral nucleoprotein DVNP.13 [Hematodinium sp. SG-2012]	AFY23224.1	7e-27	MVSRTVQLLLASKTQRLPSGEHLAPQKKKAVMKATMKRAMKKVSTIAKGRLAKVMVLRGSKAKTTGGLKASDLTKSKSGKVVSKKKSAQGKKSKWIKAVAAARTALKIKGFAVIGGKTQQGQALLKKARSFYKA

## Sheet: Cur-11
Putative plastid-targeted proteins (colored segments within sequences indicate transmembrane regions within N-terminal extensions)
Process	Homolog	Top blastp hit (nr)	Top blastp hit accession	Expect value	Protein sequence (may be incomplete)
Isoprenoid biosynthesis	Dxs	hypothetical protein JHK85_051073 [Glycine max]	KAG4936154.1	3e-131	VHDPFGAGHSSTSVSAAQGYAAGRDILRKIGDPRADDIGHCVAVIGDGAITGGMAWEALNHSGGDRTKMIVILNDNQQVSLPTHYNNVRRPIGALSKAFSSTRAASVAEAASSQLFGDLRNAAKDSGVGIFEKVFPERSFDVGIAEQHAATFAAGLACAGLKPFVAIYSTFMQRAYDQIVHDIALQKLPVRMILDRAGLVGQDGPTHGGTFDLSYLCCVPNMVVGAPANEHELVRMMGTLAAYDAGPSALRFPRASAKGAEVPTKLDPLRIGEGRLLHQGKSEIAILSLGSRLAEVEKAAAELRAAGLDVTVADARWAKPVDRELVRSLAKQHSVLVTVEDNAVGGFAAQVETALQEMDLKKSTRTHAITLPDRFIDHGTPAEQYEDAGLTARHIADTV…
Isoprenoid biosynthesis	Dxr	chloroplast 1-deoxy-D-xylulose 5-phosphate reductoisomerase precursor [Pyrocystis lunula]	ABI96272.1	2e-115	STGVLPSSFAASAPGALLAFAASLAAVHLLAKHWRSSDRRLTHFGLVPLGTNGAGRSSAPRRLAVLGSTGSVGTQTLELVQERPQEFAVECLVGGRNYALLAEQVAEFAPSLVGCEEPEKLESALKALWSSRGIAVSTPLPRILPAAEAQKLAARLPRVDAVVAAIVGFAGVDGVVEAIRADKDVLVANKETLIAAGGPISALLKAHPKARVLPIDSEHSAIFQCLQGVSSEKDVSGLVLTGSGGAFRDVPVAELKQAERAWLREKATTHPNWSMGKKITVDSSTMANKGLELIEAHRLFGVPLENIRIVLHRQSIVHSGVEFSDGSVLLQAGWPDMRHAILYGLTHPRRAAKPLAHPGTGAGFGQFWANGRLDFERPDAEKYPMLRLASLAAERGGEL…
Isoprenoid biosynthesis	IspD	2-C-methyl-D-erythritol 4-phosphate cytidylyltransferase [Actinomycetia bacterium]	MBA3717814.1	1e-26	VSTQSTWALAAGAPSVVRAAKRLLGLRARRGLLRHGERLVEELVIVAAPEWHGPVAEMLGCRSPEDCTLSGRRVLFALGGPTRAASCRNGLAALSERIETVLVHDAARPLFDEQATVDALDAVNERSVAGALLAMPPVDTVHEVAHPGTRTELARTLDRSQLALAQTPQAFNKDVLLAAHRRIDASEYSDDAALVRAAGGSILLVPAARPNLKITNAEDRAVIEALLVQRGEAX
Isoprenoid biosynthesis	IspE	4-(cytidine 5'-diphospho)-2-C-methyl-D-erythritol kinase [Planctomicrobium piriforme]	WP_175517228.1	2e-31	AASAALVARARPKINLTLDLVKKRPDGYHELVSVFQRVSGACEDTVSVRLLKSQPDQCECTGSIHVAGGPGNLALKAVRALRAQLPRAHPLQRLGVRVEITKNIPLEAGLGGGSSDAAAVLLLLQEHFARPRKSLGSWTASNAPSSSAPASRPAPREGVDSARPPQGTWAAGSTAIPRAALDLAAAAIGSDVNFFLEDTPAAVCFSRGEHVQPISVRARGAPVFLVKPRVGLSTPAVFAQVDENALTTPEAAVDRAISWVASPVGQLRNALSRPAEQVVPELCSVLRVLDAHFEHGAGLSGSGSTCFGLGRPRWGYAAVRQELAAVADIEGSWVGTLEX
Isoprenoid biosynthesis	IspF	2-C-methyl-D-erythritol 2,4-cyclodiphosphate synthase [Phycisphaerales bacterium]	HED54870.1	4e-42	MGRRPRRSALLIAAALAAVPTFGALFPALFLAPPRVGHAYDIHRMHVAPVAGNSRPLKLGGVLVSAEHEVLAHSDGDVVFHTLTDALLGACALPDIGDLFPDTDERWAGADSAALLREAAAQAWAQAACEVQGVDVTVVLQRPKAAHFKDAIRRNTAEVLGLDPSRVGLKFRTKEGLGAVGSADAVEAYAVVTATARX
Isoprenoid biosynthesis	IspG	unnamed protein product, partial [Polarella glacialis]	CAE8601733.1	2e-55	PRAGPLWERRPFAVRGGSRNLEQRRGKHHCSQLRQGSPEGRRRLPLGPGSPRLPPRTFFGSPRPRAVSSRAPPRSSSDRLARYANAQQPCRPGAALMDGMADGVCWDADFGTGAEPLGGVPAEAAVAPAERARQATFSLLQACRLRSVKTEFISCPSCGRTLFNIQEVTERIRQKTGHLPGVKIAVMGCIVNGPGEMADADFGYVGSGPGLVDLYVGREVEVRAVKEAQAVDRLVELIKKHGRWVSKEEAEQX
Isoprenoid biosynthesis	IspG	unnamed protein product [Vitrella brassicaformis CCMP3155]	CEL93656.1	5e-57	VPIVDQLAEAPAHGDFALVVRDARTAGQASARAPVAVFVAPSLGPENVVLPSEMKELTDRARGEARGAPVLAWLEHGGRDLEATLATGGAVLGAALMDGMADGVCWDADFGTGAEPLGGVPAEAAVAPAERARQATFSLLQACRLRSVKTEFISCPSCGRTLFNIQEVTERIRQKTGHLPGVKIAVMGCIVNGPGEMADADFGYVGSGPGLVDLYVGREVEVRAVKEAQAVDRLVELIKKHGRWVSKEEAEQX
Isoprenoid biosynthesis	IspH	ispH [Symbiodinium natans]	CAE7577816.1	4e-64	GMNRLGVREIPSLRDSLAKDKRAKDYRVVGPQDVVVIPAFGVSIDVVKFLHARGATLVDATCPWVTKVVNAIERGKPATTVIHGTFGHEETFATASNADKHLVVGSVEECELLCAYLLKKSGVSVASQGVASKSVEELRADVERIFRAKSSAKLDFDRDLDQIQLVNQTTMVRSETQLIAQLLERTQVERFGAKGHFSAADTICDATEARQRALYELIGAQYEPRRSALLGELERRQVGVEMTVQPGKERVLSDAEQKRRQRAAAQRESGASRSAEGPAVSSSEAARRPDMVLVVGGMDSANTAHLAEICLHHNVRAFHIKGPESLDPSTGMVLHRDPISKELKRSRLWEKVPSCVGVTSGASTPDSVLEESVAKLVDCLSSARAX
Isoprenoid biosynthesis	IspH	ispH [Symbiodinium natans]	CAE7577816.2	5e-21	VSTQSTWGHFSAADTICDATEARQRALYELIGAQYEPRRSALLGELERRQVGVEMTVQPGKERVLSDAEQKRRQRAAAQRESGASRSAEGPAVSSSEAARRPDMVLVVGGMDSANTAHLAEICLHHNVRAFHIKGPESLDPSTGMVLHRDPISKELKRSRLWEKVPSCVGVTSGASTPDSVLEESVAKLVDCLSSARAX
FeS cluster biosynthesis	SufB	Fe-S cluster assembly protein SufB [Proteobacteria bacterium]	MBW3560364.1	4e-113	VLDSSSILTSFAEELWEKHGIIFCSMSDALRRFPSLVRKYLGTVVPSSDNFYACLNAALFSDGTFVYIPPGVTCPRSLSTYFRMQAPVKPPLVRGQFERTLIIADTDAHVNYIEGCTASESSASSLHAAVVELVALGNDSTINYSTVQNWDAGSVHSSAPQSSTPRTDGPSPGARSAGVATGADRAAPEADSLFSRGVLNYVTKRGAALGKRSQVTWTQVEVGSASTWKYPSCVLVGDGSRGEFFSVAATAGRQEADSGTRMIHLGADTQSTVLAKSISRDQSRNTFRSEIVCAADGVSHATNCDSVLLGNSSATSALPSLALRGTRSATNADHQGARDRARPGAKSVVGEDGSARSEDRGDSRLQAPRPLRSQQLTHEATVSRVDEDAVAYLQSRGVS…
FeS cluster biosynthesis	SufC	Fe-S cluster assembly ATPase SufC [Nitrososphaeria archaeon]	HHN53621.1	2e-32	MSRARARSARALGLVLLALIATAPALAAWRAVDPAPARVLRGSKHGLLSATRTVNLALQDAPLVSRSVALLIAVLATTAVLLRRPWQYSQYPTSASRDTRTSQGLRLHKAQVVLQRGSSRTIVRHADLRVLPGETVILTGPNGCGKSSLLRALNGDPAYTLSGHASLHGARLAELAPEQRALAGLFATFQAPPELSGVSNLELAIAMRQARAAASPKAASTKGSMEEIRQELAEAVRRFGAASQRANVEGFIEQNVNSGSGGERKRSELVHMSLATPLEIALLDEIDSGLDATARVEVADQLGVLQANTGCGFLVVTHSTEFANLLRKRMRSTVREIRMSATGELFEDTSRRVSFGGPRX
FeS cluster biosynthesis	SufD	SufD family Fe-S cluster assembly protein [Candidatus Kerfeldbacteria bacterium]	MBI3115154.1	5e-08	TATSATTLAVAPVVCSLSSLVPWAAAEQLAGSWRAGLATVARGAALRGAALPRVALPHDAADGAALLARVVALVAVGAAVVGALARGRSRHGRRAPEPSDEEIDDFRRRMHRIWLDQRPQRSTAGVRSVGEHAVSEGKALELARRIESLAGADYDTVEVRVNSLGQGEQLGRGRHLLICVWTEATEATRRLRAIGEEAVLDEVHIVCGTPPDVTWVVHAEGSLRWHALVLGPEALEPSAAWKHSTKAMRRRVTLPKVTKSVTASLLSLRPVDDRVDAQLGAGAELSVQQRLLADAGTSQLFADLSHAAPNARSTHEARAFAAGDARVDVSGAVHIAPELDHPEYAADARQALRAVALTPEASATARPTLMLRTAEEVDASHGAALSRGPGDTLPLQARG…
FeS cluster biosynthesis	SufE	SufE family protein [Thalassolituus marinus]	WP_225675349.1	1e-07	MTHQRRYLRLRRPAAVAACVLGLLVCANSVAILWQRDSRATAPVAMQPASHGLLHGAARVFSGDQDQPWASIGADLRSWRPGSVPHTQALALVALAAMLVGVALLRRVPRGRSSSRLTRLASKLRAEGSVGRQLEVLLSVARERKGHDLVRSSGAIQPVAQKVGTIHTAPGSVTRSDAVLAARRVHGCQSPISVEARLERSTGHLTFEPMFDSSSTSRVVRGLALAVTDALSGASVAEVLAEDAGDLGAQLAHLSPQRGTGLRSIVEACQSLARDLDGQVX
FeS cluster biosynthesis	PetF	ferredoxin-1-like [Hordeum vulgare subsp. vulgare]	XP_044970065.1	2e-35	MPRSRKGALCMLALASTSVYVMLAPSLASCGSGNCEPCRTWSPRLPSDYEGEAKIERRARRLAEGNVTDGVYAADFAPSTGSNMRPEKQALETGDTNPGVSSAWTARTLGDMAEGLAGLFSAPGRRLAARTHQVTVKGPGGTEHNFECPEDSSILDAAEEAGIEMPYSCRAGACSQCAGKVLEGGVDQDEQAFLSAKQVSDGYCLTCVARPTGDVVIQSHCVDEVGX
FeS cluster biosynthesis	PetH	benzoyl-CoA 2,3-epoxidase subunit BoxA [Aestuariivita boseongensis]	WP_050931777.1	5e-39	MEGPTTVPQGPTKQAAVLNHGSRREEEALSDRARGSPTPADAAGGEPAAPRQAPTRRRPTFLPKAPLTALVREVRQLTPADDRGSAIFHIRLDHRGKLPFVPGQSIGVLPRAEGTNGSAPPQRLYSIASAGPEELALCVRRVVKDDDTLGRASGQLSSASPGDSIAVTGAFGDELTLPERWGVDESQIVCLGTGTGLAPFRGFLQELRRRRKSANMSARPKKPPMVLVVGARSRSELPYREMLLAARDEGLLELHEALSREDGEPKAYVQHALAARATRFEQLLREPSTHTYICGKKGLTSALQELPWWTTLRRALKQQRRLHVEVY
Metabolite transport	TPT	DMT family transporter: triose phosphate/phosphate [Ostreococcus lucimarinus CCE9901]	XP_001421484.1	2e-21	YQRRVHGEKQHVAPLLPQSAVDVYAQVTALSLLGCLPFVLYELPTVRWPEGVSSQHFAAHVLFVGLCYHLYNQVAFEALDALDAITHAVANVGKRVAVIGVSVVAFGHDVTTRAVLGCSIAICGAFVYGVVX
Other proteins
Process	Homolog	Top blastp hit (nr)	Top blastp hit accession	Expect value	Protein sequence (may be incomplete)
Heme biosynthesis	ALAS	ALAS [Hematodinium sp. SG-2015]	AKG25418.1	0	MHPENVRNLMTQCPVMTLSGQEVELQQNAATMRVSATQEAPPQECPYHRGAARAPQKEDYENKFGAAIEKLHKEGRYRSFANLQRHCGNFPNALFRPPPEALKRPDCENAAKHHDELMDHIPTDAHTSGVPVKIFCSNDYLGMGQHPDVVEASISAIRKSGCGAGGTRNISGSTIYHVELERELAELHQKERSLVFSSGFVANEAALSSIGQLLPNCLILSDEGNHASMIAGIRHSKCEKKLFKHNDVADLERLLQEQPLDRPKLIVFESVYSMSGAIAPMKEFARLARKYNALTFVDEVHAVGMYGKHGAGVAERDGILDGMDIISGTLGKAFGVFGGYVAGSARFIDCVRSFAGGFIFTTAIPPTVAAGALAAVRHLRYSEAERDMQQLRAKQLKQM…
Heme biosynthesis	HemB	HemB [Hematodinium sp. SG-2015]	AKG25419.1	6e-119	YQRRVHGSFATLAAHLQQLEAKGLRSVMFFGVVDNGDKDAVGGPGDLVENPVCRAMEALTKSNPELQLCADVCLCEYTSHGHCGVLKDGCDNVIDNEKTLLRLISCALAYARAGAHMVCPSDMMDGRVKALREALNTHGFQHVSICAYTSKKASVMYAPFRAAVESTFKGDRKRYQQPVAAGGVALRAAARDAAEGADILLVKPSLFYGDIIKNIATAHPELPVAVYIVSGEYKMLYDYGEQTGTMKEVVMEAHLSMMRAGARVLVTYFTPFILENLX
Heme biosynthesis	HemC	HemC [Hematodinium sp. SG-2015]	AKG25420.1	3e-66	MPPVFRLGTRKSELALWQTRHCRALLRAVAERQNTKRWFVLRAGASFGDLHLKQHLSQLGETGLFTKELEVDLLAGETDLAVHSLKDMPTTLPDKLVLAGVSARGDPRDCVCLPRTSENQPATELPARVRDGAAPLQELLAVLPEGATVGTSSLRREALLRQWRPDIKTAVVRGNVQTRLRKLDQGHDGVTFDALLLAKVGLERVDLGHRVDIPLPPLEWPHCVSQGALGLEAHSENEAALALAQAVSDRATLLATTAERALLHALEGGCQIAMGVSSDAVSADDGVDVALRCTLLDHDGKLAAVIKDATRRCVSVEDATELGQSVAAAILGEGGRAIVGEATEKRALTYGQAX
Heme biosynthesis	HemE	HemE [Hematodinium sp. SG-2015]	AKG25422.1	3e-94	MPANTLLLDTLRGTAPRGEKPPCWMMRQAGRYLPEFRALRAEHEFFKVCADKDLAAEVTIQPLRRFPLDALILFSDILVIPVAMGMPCSMVKGQGPKFHYSLAELVWGVEGEEKMAPNCADVAAAEQRIRERLTLDPVKIADQLDYVYQAAKETVRRVESGEWHSQPTDTSPAARENLQSVPLIGFSGAPWTLLSYMIEGGGSKTWARSRAFIAAFPELTKELLNAIADSCVEYLSRQVSIGNCSAIQVFETNGGELSVGVYNEFALPPFLKIATELRKRHPELPMLAFPKDVSTTKTLPTFNTSAYDGVSLSWKYDVQEACAALPDKAVQGNLDPALLYLPPAQITAEVERMREQFVQCGKDGRHICNLGHGMMPDHGVDAAGAFVAGVKLX
Fatty acid biosynthesis	ACC	acetyl CoA carboxylase 1a [Amphidinium carterae]	ASA45565.1	5e-144	MSRANADVFTLSIVTGRSVGIGSYVNRLGQRIIQKKGSPILLTGFAALNKLLGKEVYTSQEQLGGPQIMVPNGVTQLLVNDDTEAVHEMFKWLDFVPATRGALCPTLTAAPTRPLHDANPLRPVDFEPPEGVYDPRMLLAGGGGKLGLLDDGSWVEYLDGWGKSVIAGRGRLAGLPVGVIAVETRLTSRVLPADPANPLSRQSVEPRAGQVWFPDSAFKTAQALRDFRAEDVAVLIVANWRGFSGGTRDMSQEVLKFGAMIVDELVGFTDRPVTVYIPPNGELRGGAWVVIDPCINPKVMEMYADPSCRGNILEPPGVTEVKYRKAQLLDLAKREFVRTRGEEPSEAQLSKLLSTAQGVAVHFADLHDRTERMQAVGVIRAAVPYKDARRVLSFRMKRR…
Fatty acid biosynthesis	FAS2	Fatty acid synthase subunit alpha [Phytophthora megakarya]	OWZ15871.1	0	MQRTEQRFREKVPVELQLSMLDTTPHTAIDELVSACPLARTTPLCAQDVDYFVDLCKDLSLGKPVNFVPVVDETLEFWFKKDSLWCSEQLDAVPGRDAQRVCILHGPVAARFSVQMDEPIAEIFGTIHDAHVAAIVGPVVAAETIGAPLRKEPLPVQDAPAWVHRVLQCDKVMQGATRAVANPIQRVFLARDGEAAGATLAMVDGALELVSAGSIVLACLELIDGNSPRVLLRVMDARPATSESPTDTEELRLEFAYVPERSFSCLVELSRDGAVRDYYSRIWMDDASKCECSVYDTYTANVDISAADVAAFNRAIENGSESTPTLDFATVAAWRPLVQALFAEEIGGDVLRLVHLSHEFSLLPEAKTELFKVGDTLMTDASVESVKILPSGGKAVTVV…
Chromatin organization	DVNP	RecName: Full=Dinoflagellate viral nucleoprotein 5; Short=DNVP5 [Hematodinium sp.]	K9NVA6.1	1e-11	YQRRVHGRGTRRAVAAGRAQRTSGGLTADKLRRNARGTLVSAKKSEQAKASYDGSAAQRWSHALSLARAELFVSGFHPVGGATQLGQALLYCTRNHYKASSGX
Chromatin organization	DVNP	dinoflagellate viral nucleoprotein DVNP.12 [Hematodinium sp. SG-2012]	AFY23234.1	4e-25	MAPTKSGSKAKSTMKSAMKTVMKSSAKKTTSKSMKKSAKTAKKPMKKAMRVSKIATGRLAKVLVLRGSKAKTSGGLKAADLTRNKNGKVVSKKRSAQGKRSKWIQACNKARSALKITGFAPIGGKTSQGQALLRKARSFYKAX
Chromatin organization	DVNP	dinoflagellate viral nucleoprotein DVNP.1 [Hematodinium sp. SG-2012]	AFY23235.1	5e-28	MAAMKAMKKASAMKKVMKAMKKSATKKPAMKAMKAMKAKATMKKAMKKVSTIAKGRLAKVLVLRGSKAKTTGGLKASDLTKSKSGKVVSKKKSAAGKKSKWIKAVSAARAALKIKGFAVVGGKTKEGQALLKKARSLYKKX
Chromatin organization	DVNP	dinoflagellate viral nucleoprotein DVNP.12 [Hematodinium sp. SG-2012]	AFY23234.1	4e-27	YQRRVHGAKSSAMKVMKAAMKKSAMKKTAKTTMKKKAVMKKATMKRAMKKVSTIAKGKLAKVLVLRGTKAKTTGGLKASDLTKNKNGRVVSKKRSAFGKKSKWIQACNKARAALKIKGFAVIGGKTAQGQALLKKARSFYKAX
Chromatin organization	DVNP	unnamed protein product [Symbiodinium natans]	CAE7356856.1	6e-18	MAAMKAMKKASAMKKVMKAMKKSAMKKPAMKSMKAKAMKATMKKKAMKKVSTIAKGRLAKVLVLRGSKAKTTGGLKASDLTKNKNGKVVSKKKSAASKKSKWIKACTAARAALKIKGF
Chromatin organization	DVNP	dinoflagellate viral nucleoprotein DVNP.1 [Hematodinium sp. SG-2012]	AFY23235.1	1e-27	INAEYMGAQGTTLSRSPMAAMKAMKKASAMKKVMKAMKKSATKKPAMKSMKAMKAKSTMKKAMKKVSTIAKGRLAKVLVLRGSKAKTTGGLKASDLTKSKSGKVVSKKKSAAGKKSKWIKAVSAARAALKIKGFAVVGGKTKEGQALLKKARSLYKKX
Chromatin organization	DVNP	dinoflagellate viral nucleoprotein DVNP.1 [Hematodinium sp. SG-2012]	AFY23235.1	3e-26	MAAMKAMKKASAMKKVMKAMKKSAMKKPAMKSMKAKAMKATMKKKAMKKVSTIAKGRLAKVLVLRGSKAKTTGGLKASDLTKNKNGKVVSKKKSAASKKSKWIKACTAARAALKIKGFAVIGGKTSQGQALLKKARSLYKKX
Chromatin organization	DVNP	dinoflagellate viral nucleoprotein DVNP.12 [Hematodinium sp. SG-2012]	AFY23234.1	2e-27	MAAMKAMKAKSSAMKVMKAAMKKSAMKKTAKTTMKKKAVMKKATMKRAMKKVSTIAKGKLAKVLVLRGTKAKTTGGLKASDLTKNKNGRVVSKKRSAFGKKSKWIQACNKARAALKIKGFAVIGGKTAQGQALLKKARSFYKAX
Chromatin organization	DVNP	dinoflagellate viral nucleoprotein DVNP.12 [Hematodinium sp. SG-2012]	AFY23234.1	2e-27	MAAMKAMKAKSSAMKVMKAAMKKSAMKKTAKTTMKKKAVMKKATMKRAMKKVSTIAKGKLAKVLVLRGTKAKTTGGLKASDLTKNKNGRVVSKKRSAFGKKSKWIQACNKARAALKIKGFAVIGGKTAQGQALLKKARSFYKAX
Chromatin organization	DVNP	dinoflagellate viral nucleoprotein DVNP.1 [Hematodinium sp. SG-2012]	AFY23235.1	2e-26	MAAMKAMKKASAMKKVMKAMKKSATKKPAMKAMKAMKAKATMKKAMKKVSTIAKGRLAKVMVLRGSKAKTTGGLKASDLTKNKSGKVVSKKKSAASKKSKWIKACTAARAALKIKGFAVIGGKTKEGQALLKKARSLYKKX
Chromatin organization	DVNP	dinoflagellate viral nucleoprotein DVNP.4 [Hematodinium sp. SG-2012]	AFY23236.1	2e-12	KAAGKSMKSAASPKKAAAKRAGKRDRDVTPEARLPAVSPPSARAPSVWGRLTPKNLLELLVQSPGAAAAAVREIASPSDAPRKRGRPPKAVTGEAPKRGRGRPPKAATGEAPKRGRGRPPKAATGEVTKRGRGRPPKAKTAAATAKNAKKTKKTTAAKRPVGRPPKAMRGRPSKTEVAKRPVGRPPKRGRGRPKKAFSKGDTSHYKSKVLRDPTLKTTGGLTHKDLMRNKRGKIVSIAANKAAKKNAWAVAMVKARQKLGITGFQIMGGATPQGQRLLAEARKIHATLKKKX
Chromatin organization	DVNP	dinoflagellate viral nucleoprotein DVNP.1 [Hematodinium sp. SG-2012]	AFY23235.1	3e-26	INAEYMGAQGATLSRSPMAAMKAMKKASAMKKVMKAMKKSATKKPAMKAMKAMKAKATMKKAMKKVSTIAKGRLAKVMVLRGSKAKTTGGLKASDLTKNKSGKVVSKKKSAASKKSKWIKACTAARAALKIKGFAVIGGKTKEGQALLKKARSLYKKX

## Sheet: Colp-25
Putative plastid-targeted proteins
Process	Homolog	Top blastp hit (nr)	Top blastp hit accession	Expect value	Protein sequence (may be incomplete)
Isoprenoid biosynthesis	Dxs	dxs [Symbiodinium sp. CCMP2456]	CAE7815800.1	2e-53	AESVHDPFGAGHSSTSVSATQGYAAGRDLLRKLGHEKQASDIGHCVAVIGDGAITGGMAWEALNHSGGDRTKMIVILNDNQQVSLPTHYNNVRKPIGALSKSFSTTRASAVAEAATSQLFQDLRNAAKKWIKGNMPPSVLPVMQKVDEVVRDLFRPEGSKGLLFEELGYYYVGPIDGHDLTTLSHILENIK
Isoprenoid biosynthesis	IspH	4-hydroxy-3-methylbut-2-enyl diphosphate reductase [Desmonostoc vinosum HA7617-LM4]	MBW4612615.1	9e-33	YPVHKLWLTHGLIHNPQVNAAMQRLGIREVPFLPGRAAKDAKDYRVVAPGDVVVIPAFGVGIDVVRFLHARGVTLVDATCPWVTKVVNAIERGKPATTVVHGTYGHEETFATSSNAEKFL
Other proteins
Process	Homolog	Top blastp hit (nr)	Top blastp hit accession	Expect value	Protein sequence (may be incomplete)
Chromatin organization	DVNP	dinoflagellate viral nucleoprotein DVNP.6 [Hematodinium sp. SG-2012]	AFY23230.1	2e-26	GINAEYMGAQGTTPTPLTMAAMKSSMKSSMKKVMKASMKKAAMKKSAMKKPMKKVMKKVMKAVMKKKAMRVSAVAKGRMAKVMVLRGSKAKTVGGLKASDLTKNKSGRVVSKKKSAAGKKSKWMEACKKARSALKIKGFAPVGGKSSQGQALLKKARSLYKK
Chromatin organization	DVNP	unnamed protein product [Amoebophrya sp. A120]	CAD7944557.1	4e-29	YQRRVHGGTSRAYSNLLPMAAMKAMKKSSGMKVMKAAMKKASSMKKAAKPMKSMKAKAMKKTVMKKKAMKKSVIAKGKRAKASVLKGTKAKTTGGLTKADLTKNKAGKIVSKKASAAGKKNYKRIQKWAAALKAARKALGIKGFVPCGGKTKEGQALLKKVRSLVK
Chromatin organization	DVNP	unnamed protein product, partial [Polarella glacialis]	CAE8624004.1	4e-30	GINAEYMGAQVELPQHSPMAAMKAMKKASGMKVMKAAMKKKASGMKKATKSMKSMKAKAMKKTVMKKKAMKKSVVAKGKRAKASVLKGTKAKTASGLTKADLTKNKAGKVVSKKKSAAGKKAYSRISKWATALKAARKALGIKGFVPVGGKSKEGQALLKKVRSLVKK
Chromatin organization	DVNP	unnamed protein product, partial [Polarella glacialis]	CAE8624004.1	2e-28	GINAEYMGAQVELKLSPLTMAAMKSSMKKSSMKKVMKAAMKKTTKKSSGMKKSMKSMKAKAMKKTVMKKKAMKKSVVAKGKRAKASVLKGTKAKTASGLTKADLTKNKAGKVVSKKKSAAGKKNFKRIQAWATALKAARKALGIKGFVPVGGKSKEGQALLKKVRSLVKK
Chromatin organization	DVNP	unnamed protein product [Amoebophrya sp. A120]	CAD7944557.1	3e-29	GINAEYMGAQVELTQTYLLPMAAMKAMKKSSGMKVMKAAMKKASSMKKAAKPMKSMKAKAMKKTVMKKKAMKKSVIAKGKRAKASVLKGTKAKTTGGLTKADLTKNKAGKIVSKKASAAGKKNYKRIQKWAAALKAARKALGIKGFVPCGGKTKEGQALLKKVRSLVK
Chromatin organization	DVNP	unnamed protein product [Amoebophrya sp. A120]	CAD7944557.1	6e-30	YQRRVHGGTSRAYSNLLPMAAMKAMKKSSGMKVMKAAMKKASSMKKAAKPMKSMKAKAMKKTVMKKKAMKKSTIAKGKRARSSVLKGTKAKTASGLTKADLTKNKAGKIVSKKASAAGKKSFKRIQKWATALKAARKALGIKGFVPVGGKTKEGQALLKKVRSLAK
Chromatin organization	DVNP	unnamed protein product [Amoebophrya sp. A120]	CAD7944557.1	3e-19	YQRRVHGGTSRAYSHFLPMAAMKAMKKSSGMKVMKAAMKKASSMKKAAKPMKSMKAKAMKKTVMKKKAMKKSVIAKGKRARSSVLKGTKAKTASGLTKADLTKNKAGKIVSKKASAAGKKSFKRIQKWATALKAARKALGIK
Chromatin organization	DVNP	unnamed protein product [Amoebophrya sp. A120]	CAD7944557.1	1e-25	YQRRVHGGTSRAYSNLLPMAAMKAMKKSSGMKVMKAAMKKASSMKKAAKPMKSMKAKAMKKTVMKKKAMKKSVIAKGKRAKASVLKGTKAKTTGGLTKADLTKNKAGKIVSKKASAAGKKSFKRIQKWATALKAARKALGIKGVVPVGGKTK
Chromatin organization	DVNP	unnamed protein product [Amoebophrya sp. A120]	CAD7944557.1	1e-25	GINAEYMGAQVELTQTYLLPMAAMKAMKKSSGMKVMKAAMKKASSMKKAAKPMKSMKAKAMKKTVMKKKAMKKSVIAKGKRAKASVLKGTKAKTTGGLTKADLTKNKAGKIVSKKASAAGKKSFKRIQKWATALKAARKALGIKGVVPVGGKTK
