# Supplementary material for: Multiple parallel origins of parasitic Marine Alveolates
Source: Research Square preprint supplement (doi:10.21203/rs.3.rs-1472581/v2), 2023-05-01
Supplement: Supplementary file 3 [file bea194ad00be8f1541511470.docx]

**Supplementary Information**

Supplementary Information **Formal taxonomic description.** This file provides formal taxonomic descriptions of *Eleftheros xomoi* and *E. karadeniz*.

Supplementary Table 1 **Predicted *Eleftheros* plastid-targeted proteins and other proteins of interest.** *Eleftheros* proteins with predicted N-terminal plastid transit peptides and/or plastid-type origin and other proteins listed in the manuscript are presented. *E. xomoi* (strain 1, Colp-37), *E. xomoi* (strain 2, Cur-11) and *E. karadeniz* (Colp-25) data are presented on separate tabs. Note that some protein sequences are incomplete.

Supplementary Table 2 **Eleftherid distribution and abundance in environmental samples.**

Environmental SSU rRNA reads that share 97% or greater sequence identity with eleftherids, *E. xomoi* (strain 1, Colp-37), *E. xomoi* (strain 2, Cur-11), and *E. karadeniz* (Colp-25) are listed in tab 1. The included environmental studies and the distribution and abundance of eleftherid hits per study are presented in tab 2.

Supplementary Video 1 **Swimming cells of *Eleftheros xomoi* and flagella beating**, visualized by light microscopy.
